# Supplementary material for: Recovery of tropical marine benthos after a trawl ban demonstrates linkage between abiotic and biotic changes
Source: PubMed Central journal article supplement (PMC7887210; doi:10.1038/s42003-021-01732-y), 2021-02-16
Supplement: 42003_2021_1732_MOESM6_ESM.pdf [file 42003_2021_1732_MOESM6_ESM.pdf]

## Reporting Summary

Nature Research wishes to improve the reproducibility of the work that we publish. This form provides structure for consistency and transparency in reporting. For further information on Nature Research policies, see our [Editorial Policies](#) and the [Editorial Policy Checklist](#).

### Statistics

For all statistical analyses, confirm that the following items are present in the figure legend, table legend, main text, or Methods section.

n/a Confirmed

- The exact sample size ( $n$ ) for each experimental group/condition, given as a discrete number and unit of measurement
- A statement on whether measurements were taken from distinct samples or whether the same sample was measured repeatedly
- The statistical test(s) used AND whether they are one- or two-sided  
*Only common tests should be described solely by name; describe more complex techniques in the Methods section.*
- A description of all covariates tested
- A description of any assumptions or corrections, such as tests of normality and adjustment for multiple comparisons
- A full description of the statistical parameters including central tendency (e.g. means) or other basic estimates (e.g. regression coefficient) AND variation (e.g. standard deviation) or associated estimates of uncertainty (e.g. confidence intervals)
- For null hypothesis testing, the test statistic (e.g.  $F$ ,  $t$ ,  $r$ ) with confidence intervals, effect sizes, degrees of freedom and  $P$  value noted  
*Give  $P$  values as exact values whenever suitable.*
- For Bayesian analysis, information on the choice of priors and Markov chain Monte Carlo settings
- For hierarchical and complex designs, identification of the appropriate level for tests and full reporting of outcomes
- Estimates of effect sizes (e.g. Cohen's  $d$ , Pearson's  $r$ ), indicating how they were calculated

*Our web collection on [statistics for biologists](#) contains articles on many of the points above.*

### Software and code

Policy information about [availability of computer code](#)

Data collection

Data analysis

For manuscripts utilizing custom algorithms or software that are central to the research but not yet described in published literature, software must be made available to editors and reviewers. We strongly encourage code deposition in a community repository (e.g. GitHub). See the Nature Research [guidelines for submitting code & software](#) for further information.

### Data

Policy information about [availability of data](#)

All manuscripts must include a [data availability statement](#). This statement should provide the following information, where applicable:

- Accession codes, unique identifiers, or web links for publicly available datasets
- A list of figures that have associated raw data
- A description of any restrictions on data availability

## Field-specific reporting

Please select the one below that is the best fit for your research. If you are not sure, read the appropriate sections before making your selection.

Life sciences       Behavioural & social sciences       Ecological, evolutionary & environmental sciences

For a reference copy of the document with all sections, see [nature.com/documents/nr-reporting-summary-flat.pdf](https://www.nature.com/documents/nr-reporting-summary-flat.pdf)

## Ecological, evolutionary & environmental sciences study design

All studies must disclose on these points even when the disclosure is negative.

|                                   |                                                                                                                                                                                                                                                                                                                                                                                                                                                                                                                                                                                                                                                                                                                                                                             |
|-----------------------------------|-----------------------------------------------------------------------------------------------------------------------------------------------------------------------------------------------------------------------------------------------------------------------------------------------------------------------------------------------------------------------------------------------------------------------------------------------------------------------------------------------------------------------------------------------------------------------------------------------------------------------------------------------------------------------------------------------------------------------------------------------------------------------------|
| Study description                 | This study was conducted to collect macrobenthic samples from 28 sites in the tropical Hong Kong waters in June 2012 and June 2015. The 28 survey sites located in three hydrological regions (i.e., Estuarine, Transitional and Oceanic) and seven Water Control Zones in Hong Kong. At each site, six sediment samples were collected, five for biotic analyses and one for abiotic analyses.                                                                                                                                                                                                                                                                                                                                                                             |
| Research sample                   | This study collected a total of 429 macrobenthos species (123 families in 8 phyla in the 2012 survey, and 119 families in 8 phyla in the 2015 survey), including Polychaetes (e.g., <i>Oxydromus obscurus</i> ), Molluscs (e.g., <i>Paratapes undulatus</i> ), Crustacean (e.g., <i>Typhlocarcinus villosus</i> ), and echinoderms (e.g., <i>Acaudina</i> sp.), and other invertebrates.                                                                                                                                                                                                                                                                                                                                                                                    |
| Sampling strategy                 | Five sediment samples for faunal analysis and one sediment sample for sediment analysis were collected using a 0.1 m <sup>2</sup> van Veen grab at each site.                                                                                                                                                                                                                                                                                                                                                                                                                                                                                                                                                                                                               |
| Data collection                   | In the laboratory, macrobenthic samples were rinsed with freshwater (by Yanan Sun, Yang James Xie, Yanjie Zhang, Ting Xu and Jian-Wen Qiu), then picked up from the sieved residues and transferred to 70% ethanol (by Yanan Sun, Yang James Xie, Yanjie Zhang, Ting Xu and Zhi Wang) and later identified to the lowest possible taxonomic level (by Institute of Oceanology Chinese Academy of Sciences, Yanan Sun and Zhi Wang). Abundance was determined by counting only specimens with anterior fragment (by Institute of Oceanology Chinese Academy of Sciences, Yanan Sun and Zhi Wang). Samples were then blotted dry with a paper towel and weighed using an electronic balance (by Institute of Oceanology Chinese Academy of Sciences, Yanan Sun and Zhi Wang). |
| Timing and spatial scale          | Samples were collected on 5-8 June 2012 and on 8, 9, 17, 29, 30 June 2015.                                                                                                                                                                                                                                                                                                                                                                                                                                                                                                                                                                                                                                                                                                  |
| Data exclusions                   | Before the PCA procedure, multi-collinearity among the abiotic variables was detected with the VIF (variance inflation factor) command in the "CAR" package, and variables (here refers to total volatile solids) had a clear sign of collinearity (i.e., VIF value > 10) were excluded from further analysis.                                                                                                                                                                                                                                                                                                                                                                                                                                                              |
| Reproducibility                   | Further studies based on collection of faunal and sediment samples in the surveyed sampling sites in sub-tidal Hong Kong waters could be useful to verify the reproducibility of our experimental findings.                                                                                                                                                                                                                                                                                                                                                                                                                                                                                                                                                                 |
| Randomization                     | The Canonical Analysis of Principal Coordinates (CAP) in this study aim to compare differences among three surveys in 2001, 2012, and 2015. So abundance data of macrobenthos in the 28 surveyed sites were allocated in groups according to years before the CAP procedure.                                                                                                                                                                                                                                                                                                                                                                                                                                                                                                |
| Blinding                          | Blinding was not relevant to this study.                                                                                                                                                                                                                                                                                                                                                                                                                                                                                                                                                                                                                                                                                                                                    |
| Did the study involve field work? | <input checked="" type="checkbox"/> Yes <input type="checkbox"/> No                                                                                                                                                                                                                                                                                                                                                                                                                                                                                                                                                                                                                                                                                                         |

## Field work, collection and transport

|                        |                                                                                                                                                                                                                                                                                                                                                                                                                      |
|------------------------|----------------------------------------------------------------------------------------------------------------------------------------------------------------------------------------------------------------------------------------------------------------------------------------------------------------------------------------------------------------------------------------------------------------------|
| Field conditions       | Field sampling work was conducted in the tropical Hong Kong waters in June 2012 and June 2015. Total Precipitation was 261.5mm in June 2012 and 302.1 mm in June 2015. Average temperature 26.0-29.9 Celsius degree in June 2012 and 27.3-30.9 Celsius degree in June 2015. ٤                                                                                                                                        |
| Location               | Sampling was taken in the Hong Kong waters (113° 53' 29.6959"E-114° 25' 53.3783"E, 22° 09' 11.7445"N-22° 33' 35.5757"N), water depth from 1.1m-47.9m.                                                                                                                                                                                                                                                                |
| Access & import/export | Not applicable.                                                                                                                                                                                                                                                                                                                                                                                                      |
| Disturbance            | For the abiotic variables, natural and anthropogenic disturbances might have influenced estimation of the SUS and turbidity loads. To minimize the random effects, mean values of SUS and turbidity data from 12 months before and on the sampling month (July 2000-June 2001, July 2011-June 2012, July 2014-June 2015; measurement once per month) of the surveyed 25 sites were used in subsequent data analyses. |

## Reporting for specific materials, systems and methods

We require information from authors about some types of materials, experimental systems and methods used in many studies. Here, indicate whether each material, system or method listed is relevant to your study. If you are not sure if a list item applies to your research, read the appropriate section before selecting a response.

## Materials &amp; experimental systems

## Methods

- n/a | Involved in the study
- Antibodies
  - Eukaryotic cell lines
  - Palaeontology and archaeology
  - Animals and other organisms
  - Human research participants
  - Clinical data
  - Dual use research of concern

- n/a | Involved in the study
- ChIP-seq
  - Flow cytometry
  - MRI-based neuroimaging

## Animals and other organisms

Policy information about [studies involving animals](#); [ARRIVE guidelines](#) recommended for reporting animal research

|                         |                                                                                                                                                                                                                                                                                                                                                                                                                                                                                                                                                                                                                                 |
|-------------------------|---------------------------------------------------------------------------------------------------------------------------------------------------------------------------------------------------------------------------------------------------------------------------------------------------------------------------------------------------------------------------------------------------------------------------------------------------------------------------------------------------------------------------------------------------------------------------------------------------------------------------------|
| Laboratory animals      | Not applicable.                                                                                                                                                                                                                                                                                                                                                                                                                                                                                                                                                                                                                 |
| Wild animals            | Not applicable.                                                                                                                                                                                                                                                                                                                                                                                                                                                                                                                                                                                                                 |
| Field-collected samples | Five sediment samples for faunal analysis and one sediment sample for sediment analysis were collected using a 0.1 m <sup>2</sup> van Veen grab at each site. The faunal samples were gently rinsed through a 0.5 mm-mesh sieve at sea. Residues retained on the sieve, including macrobenthos, were transferred into labelled plastic bags, fixed in 5% formalin solution in seawater and stained with 1% Rose Bengal. Approximately 400 g sediment at each site were scooped into a plastic bag for sediment analysis, kept on ice on board in a cooler, and transported to the laboratory and frozen at -20 °C in a freezer. |
| Ethics oversight        | No ethical approval or guidance was required. This study basically focused on the collection, identification and analysis of marine invertebrates and there was no violation of ethics during the study.                                                                                                                                                                                                                                                                                                                                                                                                                        |

Note that full information on the approval of the study protocol must also be provided in the manuscript.
